# Supplementary material
Source: MDPI journal article supplement (https://www.mdpi.com/2076-3417/12/9/4438)
Supplement: s1 [file s1]

# Supplementary material

Article

## Chemical speciation of Antarctic atmospheric depositions

Stefano Bertinetti<sup>1</sup>, Silvia Berto<sup>1\*</sup>, Mery Malandrino<sup>1</sup>, Davide Vione<sup>1</sup>, Ornella Abollino<sup>2</sup>, Eleonora Conca<sup>1</sup>, Matteo Marafante<sup>1</sup>, Anna Annibaldi<sup>3</sup>, Cristina Truzzi<sup>3</sup>, Silvia Illuminati<sup>3</sup>.

<sup>1</sup> Department of Chemistry, Università di Torino, via P. Giuria 7, 10125 Turin, Italy; stefano.bertinetti@unito.it; silvia.berto@unito.it; mery.malandrino@unito.it; davide.vione@unito.it; eleonora.conca@unito.it; matteo.marafante@edu.unito.it;

<sup>2</sup> Department of Drug Science and Technology, Università di Torino, Via P. Giuria 9, 10125 Turin, Italy; ornella.abollino@unito.it

<sup>3</sup> Department of Life and Environmental Sciences, Università Politecnica delle Marche, Via Brecce Bianche, Ancona, Italy; a.annibaldi@univpm.it; c.truzzi@univpm.it; s.illuminati@staff.univpm.it

\* Correspondence: silvia.berto@unito.it; Tel.: 00390116705279

### 1. NIST 1640a Certified Reference Material analysis

The NIST 1640a Certified Reference Material (CRM) was used to validate the measurement procedure by both ICP-OES and HR-ICP-MS. The CRM was an acidified (2%) spring water and it was analyzed without treatment or diluted, in order to best simulate the concentration level of real samples. All measurements were performed in triplicate. The best percentage recovery obtained for the cations of interest and the corresponding measurement conditions are shown in Table S1.

**Table S1** Concentrations of certified elements in the NIST 1640a and corresponding expanded uncertainties (95 % level of confidence), estimated percentage recovery and corresponding measurement conditions.

| Element | Certificate value ( $\mu\text{g L}^{-1}$ ) | Uncertainty <sup>a</sup> ( $\mu\text{g L}^{-1}$ ) | % recovery | Meas. conditions          |
|---------|--------------------------------------------|---------------------------------------------------|------------|---------------------------|
| Cu      | 85.75                                      | 0.51                                              | 100.81     | HR-ICP-MS MR <sup>b</sup> |
| Fe      | 36.8                                       | 1.8                                               | 99.66      | HR-ICP-MS MR              |
| Mn      | 40.39                                      | 0.36                                              | 99.89      | HR-ICP-MS MR              |
| Zn      | 55.64                                      | 0.35                                              | 99.22      | HR-ICP-MS MR              |

#### Indicative concentrations

| Element | Certificate value ( $\text{mg L}^{-1}$ ) | Uncertainty <sup>a</sup> ( $\text{mg L}^{-1}$ ) | % recovery | Meas. conditions     |
|---------|------------------------------------------|-------------------------------------------------|------------|----------------------|
| Ca      | 5.615                                    | 0.021                                           | 101.06     | ICP-OES <sup>c</sup> |
| Mg      | 1.0586                                   | 0.0041                                          | 99.55      | ICP-OES              |
| K       | 0.5799                                   | 0.0023                                          | 97.38      | ICP-OES              |
| Na      | 3.137                                    | 0.031                                           | 102.18     | ICP-OES              |

<sup>a</sup> Expanded uncertainty with 95% level of confidence.

<sup>b</sup> HR-ICP-MS: High Resolution - Inductively Coupled Plasma – Mass Spectrometry (analytical technique); MR: medium resolution (working conditions)

<sup>c</sup> ICP-OES: Inductively Coupled Plasma – Optical Emission Spectroscopy (analytical technique).
